# Supplementary material for: Service Process Factors Affecting Patients’ and Clinicians’ Experiences on Rapid Teleconsultation Implementation in Out-patient Neurology Services during COVID-19 Pandemic: A Scoping Review
Source: Research Square preprint supplement (doi:10.21203/rs.3.rs-1125499/v2), 2022-03-01
Supplement: Supplementary file 2 [file dafae795f2182475d52920a6.docx]

# Additional file 3 Major search terms statements April 17, 2021

## Virtual Consultation

### Indexed Terms:

- Ambulatory Care (MH PsycINFO, CINAHL MW, Scopus INDEXTERMS, MeSH)
- Ambulatory Care Facilities (MH PsycINFO, MeSH)
- Distance Counseling (MH PsycINFO, CINAHL MW, Scopus INDEXTERMS, MeSH)
- Home Care Services (MH PsycINFO, CINAHL MW, Scopus INDEXTERMS, MeSH)
- Outpatients (MH PsycINFO, CINAHL MW, Scopus INDEXTERMS, MeSH)
- Remote Consultation (MH PsycINFO, CINAHL MW, Scopus INDEXTERMS, MeSH)
- Telehealth (CINAHL MW, Scopus INDEXTERMS)
- Telemedicine (MH PsycINFO, CINAHL MW, Scopus INDEXTERMS, MeSH)
- Teleneurology (CINAHL MW, Scopus INDEXTERMS)
- Telenursing (CINAHL MW, Scopus INDEXTERMS)
- Telestroke (Scopus INDEXTERMS, CINAHL MW)
- Videoconferencing (MH PsycINFO, CINAHL MW, Scopus INDEXTERMS, MeSH)

### Free-text Terms:

- Digital health
- eConsult
- eHealth
- electronic visit
- eVisit
- outpatient
- Remote care
- Remote consult
- Remote health
- Teleconsult
- Telehealth
- Telemedicine
- Teleneurology
- Telestroke
- Televisit
- Video Visit
- Virtual care
- Virtual health

## Patient/Clinician Perspective

### Indexed Terms:

- Attitude of Health Personnel (MH PsycINFO, CINAHL MW, Scopus INDEXTERMS, MeSH)
- Attitude to Health (MH PsycINFO, CINAHL MW, Scopus INDEXTERMS, MeSH)
- Job Satisfaction (MH PsycINFO, CINAHL MW, Scopus INDEXTERMS, MeSH)
- Nurse Patient Relations (MH PsycINFO, CINAHL MW, Scopus INDEXTERMS, MeSH)
- Outcome Assessment Health Care (MH PsycINFO, CINAHL MW, Scopus INDEXTERMS, MeSH)
- Outpatients (MH PsycINFO)
- Patient Preference (CINAHL MW, Scopus INDEXTERMS)
- Patient satisfaction (MH PsycINFO, CINAHL MW, Scopus INDEXTERMS, MeSH)
- Patient-Centered Care (MH PsycINFO, CINAHL MW, Scopus INDEXTERMS, MeSH)
- Personal satisfaction (MH PsycINFO, CINAHL MW, Scopus INDEXTERMS, MeSH)
- Physician Patient Relations (MH PsycINFO, CINAHL MW, Scopus INDEXTERMS, MeSH)
- Practice Patterns Nurses (MH PsycINFO, CINAHL MW, Scopus INDEXTERMS, MeSH)
- Practice Patterns Physicians (MH PsycINFO, CINAHL MW, Scopus INDEXTERMS, MeSH)
- Professional patient Relations (MH PsycINFO, MeSH)
- Professional-Client Relations (Scopus INDEXTERMS, CINAHL MW)
- Professional-Patient Relations (CINAHL MW, Scopus INDEXTERMS)
- Quality of Health Care (MH PsycINFO, CINAHL MW, Scopus INDEXTERMS, MeSH)
- Surveys and Questionnaires (MH PsycINFO, CINAHL MW, Scopus INDEXTERMS, MeSH)

### Free-Text Terms:

- Patient-centered
- User-centered
- Combination of: (Patient, Health Personnel, Provider, Physician, Nurse, Neurologist, Clinician, User, Outpatient, Ambulatory) AND (satisfaction, experience, perspective, Evaluation, Survey, Lessons, Practices, Observation, Attitude OR View)

## Neurology

### Indexed Terms:

- Cerebrovascular Disorders (MH PsycINFO, CINAHL MW, Scopus INDEXTERMS, MeSH)
- Neurologic Examination (MH PsycINFO, CINAHL MW, Scopus INDEXTERMS, MeSH)
- Neurologists (MH PsycINFO, CINAHL MW, Scopus INDEXTERMS, MeSH)
- Neurology (MH PsycINFO, CINAHL MW, Scopus INDEXTERMS, MeSH)
- Neurosurgical Procedures (MH PsycINFO, CINAHL MW, Scopus INDEXTERMS, MeSH)
- Stroke (MH PsycINFO, CINAHL MW, Scopus INDEXTERMS, MeSH)
- Stroke Units (CINAHL MW, Stroke Units (Scopus INDEXTERMS)

### Free-Text Terms:

- Stroke
- Neurology
- Neurologist

## Full Search Statements for all 4 Databases

### Pubmed 552 (April 17, 2021)

(("2019/11/01"[Date - Publication] : "3000"[Date - Publication])) AND (((((telemedicine[MeSH] OR videoconferencing[MeSH] OR remote consultation[MeSH] OR Ambulatory Care Facilities[MeSH] OR Outpatients[MeSH] OR Ambulatory Care[MeSH] OR Distance Counseling[MeSH] OR Home Care Services[MeSH] OR Tele?medicine[TiAb] OR Tele?health*[TiAb] OR Tele?neurolog* [TiAb] OR tele?stroke[TiAb] OR Tele?consult*[TiAb] OR Digital?health*[TiAb] OR Tele?visit*[tiab] OR e?Health[Ti] OR e?consult*[Tiab] OR ((Virtual*[Tiab] OR Remote*[tiab]) AND (health[tiab] OR care[tiab])) OR e?visit*[Tiab] OR "electronic visit*"[Tiab] OR outpatient*[Tiab] OR "Video Visit*"[tiab] OR "remote consult*"[tiab]) AND (Outcome Assessment, Health Care[MeSH] OR Quality of Health Care[MeSH] OR Surveys and Questionnaires[MeSH] OR Practice Patterns, Physicians'[MeSH] OR Practice Patterns, Nurses[MeSH] OR Professional patient relations[MeSH] OR Physician Patient Relations[MeSH] OR Nurse Patient Relations[MeSH] OR Job Satisfaction[MeSH] OR Patient satisfaction[MeSH] OR Personal satisfaction[MeSH] OR Patient-Centered Care[MeSH] OR Patient-center*[Tiab] OR User-center*[Tiab] OR (Patients[MeSH] OR Patient*[Tiab] OR Health Personnel[MeSH] OR Provider*[Tiab] OR Physician*[Tiab] OR Nurse*[MeSH] OR Nurse*[Tiab] OR Neurologist*[TiAB] OR "Neurologists"[MeSH] OR Clinician*[tiab] OR User*[tiab] OR Outpatients[MeSH] OR Outpatient*[Tiab] OR Ambulatory) AND (satisfaction*[Tiab] OR experience*[Tiab] OR perspective*[Tiab] OR Evaluation*[Tiab] OR Survey*[Tiab] OR Lesson*[Tiab] OR Practice* [Tiab] OR Observation*[Tiab] OR Attitude*[Tiab] OR View*[Tiab] OR Attitude of Health Personnel[MeSH] OR Attitude to Health[MeSH] ))) AND (Stroke[MeSH] OR Stroke*[Tiab] OR Neurology[MeSH] OR Neurolog*[Tiab] OR "Cerebrovascular Disorders"[MeSH] OR Neurosurgical Procedures[MeSH] OR Neurologic Examination[MeSH] OR Neurologists[MeSH])) NOT (Rehabilitation[MeSH] OR Telerehabilitation[MeSH] OR Rehabilitation[TiAb] OR Telerehabilitation[TiAb] OR Editorial[Publication Type] OR Letter[Publication Type] OR Comment[Publication Type] OR News*[Publication Type] OR Review*[Publication Type] OR Letter[Tiab] OR Comment*[Tiab] OR Systematic Review[Ti] OR Scoping Review[Ti])) AND (journalarticle[Filter] AND 2020/3/1:3000/12/12[pdat] AND English[Filter]))

### CINAHL 174 (April 17, 2021) Filter: Nov 2019 to present (Limiters - Published Date: 20191101-)

(MW ( "Remote Consultation" OR "Telemedicine" OR "Videoconferencing" OR "Telenursing" OR "Telehealth" OR “Ambulatory Care” OR “Outpatients” OR “Distance Counseling” OR “Home Care Services” OR telestroke OR teleneurology ) OR TI ( Tele?medicine OR Tele?health* OR Tele?neurolog* OR tele?stroke OR Tele?consult* OR Digital?health* OR Tele?visit* OR e?Health OR e?consult* OR “Virtual health” OR “Remote care” OR e?visit* OR "electronic visit*" OR outpatient* OR "Video Visit*" OR "remote consult*" ) OR AB ( Tele?medicine OR Tele?health* OR Tele?neurolog* OR tele?stroke OR Tele?consult* OR Digital?health* OR Tele?visit* OR e?Health OR e?consult* OR “Virtual health” OR “Remote care” OR e?visit* OR "electronic visit*" OR outpatient* OR "Video Visit*" OR "remote consult*" )) AND (MW ( "Stroke+" OR "Stroke Units" OR "Stroke Patients" OR neurology OR "Cerebrovascular Disorders" OR “Neurologists” OR “Neurosurgical Procedures” OR “Neurologic Examination” ) OR TI ( "Stroke" OR "Neurolog*" ) OR AB ( "Stroke" OR "Neurolog*" )) AND (MW ( "Quality of Health Care" OR "Patient Preference" OR "Patient Satisfaction+" OR "Personal Satisfaction" OR "Professional-Client Relations+" OR "Professional-Patient Relations" OR "Physician-Patient Relations" OR "Nurse-Patient Relations" OR “Outcome Assessment, Health Care” OR “Surveys and Questionnaires” OR “Practice Patterns, Physicians'“ OR “ Practice Patterns, Nurses“ OR “Job Satisfaction“ OR “Patient-Centered Care” OR “Attitude of Health Personnel” OR “Attitude to Health” ) OR TI ( “Patient-center*” OR “User-center*” OR ((“Patient*” OR “Health Personnel” OR “Provider*” OR “Physician*” OR “Nurse*” OR “Neurologist*” OR “Clinician*” OR “User*”) AND (“satisfaction*” OR “experience*” OR “perspective*” OR “Evaluation*” OR “Survey*” OR “Lesson*” OR “Practice*” OR “Observation*” OR “Attitude*” OR “View*”)) ) OR AB ( “Patient-center*” OR “User-center*” OR ((“Patient*” OR “Health Personnel” OR “Provider*” OR “Physician*” OR “Nurse*” OR “Neurologist*” OR “Clinician*” OR “User*”) AND (“satisfaction*” OR “experience*” OR “perspective*” OR “Evaluation*” OR “Survey*” OR “Lesson*” OR “Practice*” OR “Observation*” OR “Attitude*” OR “View*”)) )) NOT (MW ( “Telerehabilitation” OR “Rehabilitation” ) OR TI ( “Rehabilitat*” OR Telerehabilitat*” OR “Systematic Review” OR “Scoping Review” OR “Rapid Review” OR “Opinion*” ) OR AB ( “Rehabilitat*” OR Telerehabilitat*” OR “Systematic Review” OR “Scoping Review” OR “Rapid Review” OR “Opinion*” ) OR PT ( “Editorial” OR “Letter” OR “Comment*” OR “News*” OR “Review*” OR “Opinion*” ))

### Scopus 381 (April 17, 2021)

( ( INDEXTERMS ( "Stroke" OR "Stroke Units" OR "Stroke Patients" OR neurology OR "Cerebrovascular Disorders" OR "Neurologists" OR "Neurosurgical Procedures" OR "Neurologic Examination" ) OR TITLE-ABS-KEY ( "Stroke" OR "Neurolog*" ) ) AND ( INDEXTERMS ( "Remote Consultation" OR "Telemedicine" OR "Videoconferencing" OR "Telenursing" OR "Telehealth" OR "Ambulatory Care" OR "Outpatients" OR "Distance Counseling" OR "Home Care Services" OR telestroke OR teleneurology ) OR TITLE-ABS-KEY ( telehealth OR telemedicine OR e?health OR e?consultation OR "remote consult*" OR "telephone consult*" OR "" teleconsult* "" OR "" virtual* AND visit* "" OR e?visit* OR "electronic visit*" ) ) AND ( INDEXTERMS ( "Quality of Health Care" OR "Patient Preference" OR "Patient Satisfaction" OR "Personal Satisfaction" OR "Professional-Client Relations" OR "Professional-Patient Relations" OR "Physician-Patient Relations" OR "Nurse-Patient Relations" OR "Outcome Assessment, Health Care" OR "Surveys and Questionnaires" OR "Practice Patterns, Physicians'" OR " Practice Patterns, Nurses" OR "Job Satisfaction" OR "Patient-Centered Care" OR "Attitude of Health Personnel" OR "Attitude to Health" ) OR TITLE-ABS-KEY ( "Patient-center*" OR "User-center*" OR ( "Patient*" OR "Health Personnel" OR "Provider*" OR "Physician*" OR "Nurse*" OR "Neurologist*" OR "Clinician*" OR "User*" ) AND ( "satisfaction*" OR "experience*" OR "perspective*" OR "Evaluation*" OR "Survey*" OR "Lesson*" OR "Practice*" OR "Observation*" OR "Attitude*" OR "View*" ) ) ) ) AND NOT ( INDEXTERMS ( "Telerehabilitation" OR "Rehabilitation" ) OR TITLE-ABS-KEY ( "Rehabilitat*" OR "Telerehabilitat*" OR "Systematic Review" OR "Scoping Review" OR "Rapid Review" OR "Opinion*" ) ) AND ( LIMIT-TO ( SRCTYPE , "j" ) ) AND ( LIMIT-TO ( PUBSTAGE , "final" ) ) AND ( LIMIT-TO ( DOCTYPE , "ar" ) ) AND ( LIMIT-TO ( PUBYEAR , 2021 ) OR LIMIT-TO ( PUBYEAR , 2020 ) ) AND ( LIMIT-TO ( LANGUAGE , "English" ) )

### PsycInfo 34 (April 17, 2021) limit 5 to (peer reviewed journal and english language and yr="2019")

1 (telemedicine or videoconferencing or remote consultation or Ambulatory Care Facilities or Outpatients or Ambulatory Care or Distance Counseling or Home Care Services).mh. or (Tele?medicine or Tele?health* or Tele?neurolog* or tele?stroke or Tele?consult* or Digital?health* or Tele?visit* or e?Health or e?consult* or e?visit* or "electronic visit*" or outpatient* or "Video Visit*" or "remote consult*" or ((Virtual* or Remote*) and (health or care))).ti. or (Tele?medicine or Tele?health* or Tele?neurolog* or tele?stroke or Tele?consult* or Digital?health* or Tele?visit* or e?Health or e?consult* or e?visit* or "electronic visit* " or outpatient* or "Video Visit* " or "remote consult* " or ((Virtual* or Remote*) and (health or care))).ab.

2 (Outcome Assessment Health Care or Quality of Health Care or "Surveys and Questionnaires" or Practice Patterns Physicians or Practice Patterns Nurses or Professional patient relations or Physician Patient Relations or Nurse Patient Relations or Job Satisfaction or Patient satisfaction or Personal satisfaction or Patient-Centered Care or Outpatients or Ambulatory or Attitude of Health Personnel or Attitude to Health).mh. or (Patient-center* or User-center* or ((Patient* or Health Personnel or Provider* or Physician* or Nurse* or Neurologist* or Clinician*OR User*) and (satisfaction* or experience* or perspective* or Evaluation* or Survey* or Lesson* or Practice* or Observation* or Attitude* or View*))).ti. or (Patient-center* or User-center* or ((Patient* or Health Personnel or Provider* or Physician* or Nurse* or Neurologist* or Clinician*OR User*) and (satisfaction* or experience* or perspective* or Evaluation* or Survey* or Lesson* or Practice* or Observation* or Attitude* or View*))).ab.

3 (Stroke or Neurology or Cerebrovascular Disorders or Neurosurgical Procedures or Neurologic Examination or Neurologists).mh. or (Stroke* or Neurolog*).ti. or (Stroke* or Neurolog*).ab.

4 (Rehabilitation or Telerehabilitation).mh. or (Rehabilitat* or Telerehabilitat* or Letter or Comment* or Systematic Review or Scoping Review).ti. or (Rehabilitat* or Telerehabilitat*).ab. or (Editorial or Letter or Comment or News* or Review*).pt.

5 (1 and 2 and 3) not 4

6 limit 5 to (peer reviewed journal and english language and yr="2021")
